# Supplementary material for: Evaluation of the effectiveness and cost-effectiveness of the chronic disease co-care (CDCC) Pilot Scheme: a study protocol
Source: Springer Nature journal article supplement (doi:10.1186/s12875-025-02765-6), 2025-03-19
Supplement: MOESM1 [file 12875_2025_2765_MOESM1_ESM.pdf]

## Appendix A: Evaluation framework for the Chronic Disease Co-Care (CDCC) Pilot Scheme

| Human Resources       |                                                                                                                                                                                                                                                                                                                                                                                                                                                            | Target Std | Service provider          | Source              |
|-----------------------|------------------------------------------------------------------------------------------------------------------------------------------------------------------------------------------------------------------------------------------------------------------------------------------------------------------------------------------------------------------------------------------------------------------------------------------------------------|------------|---------------------------|---------------------|
| 1.                    | There <b>must</b> be designated coordinator(s) to oversee the CDCC-Pilot Scheme in the Primary Healthcare Office (PHO).                                                                                                                                                                                                                                                                                                                                    | 100%       | PHO                       | SOC Qn              |
| 2.                    | There <b>must</b> be designated coordinator(s) to oversee the CDCC-Pilot Scheme at each District Health Centre (DHC) / District Health Centre Express (DHCE).                                                                                                                                                                                                                                                                                              | 100%       | DHC(E)                    | SOC Qn              |
| 3.                    | There <b>must</b> be a multidisciplinary team of health care personnel, including Scheme Doctor(s), nurse(s), physiotherapist(s), dietitian(s), optometrist(s), podiatrist(s), and supporting staff to implement the scheme.<br><i>(Health care personnel can either be in-house staff or Network Medical Practitioners (NMP) Network Service Providers (NSP) Please specify the number of programme staff and their time dedicated to the programme.)</i> | 100%       | DHC(E)                    | Site visit & SOC Qn |
| 4.                    | Nurse(s) and allied health professional(s), including physiotherapist(s), dietitian(s), optometrist(s) and podiatrist(s), <b>must</b> be accessible to scheme participants when indicated.<br><i>("accessible to" mean able to be visited by)</i>                                                                                                                                                                                                          | 100%       | Nurse, AH (NSP or DHC(E)) | Site visit & SOC Qn |
| 5.                    | Specialist(s) at the Hospital Authority <b>must</b> be accessible to participants for one-off bi-directional specialist consultation service(s) when indicated.<br><i>("accessible to" means able to be visited by)</i>                                                                                                                                                                                                                                    | 100%       | HA / DHC(E)               | Site visit & SOC Qn |
| 6.                    | DHC/DHCE staff, scheme doctors, nurses and allied health professionals <b>must</b> be familiar with the CDCC-Pilot Scheme's objectives, service manual, clinical workflow including referral pathway, IT system and payment system.<br><i>("familiar" means being able to provide an overview of the scheme's objectives and logistics Please attach a summary.)</i>                                                                                       | 100%       | DHC(E), FD, Nurse, AH     | Site visit & SOC Qn |
| 7.                    | Scheme doctors and nurses <b>must</b> know the Hong Kong Reference Frameworks on life course preventive care, diabetes care and hypertension care for adults in primary care setting.<br><i>("know" means having read and understand the relevant Hong Kong Reference Frameworks)</i>                                                                                                                                                                      | 100%       | FD, Nurse                 | Site visit & SOC Qn |
| 8.                    | DHC/DHCE staff, scheme doctors, nurses and allied health professionals <b>must</b> have undergone relevant training to the scheme.                                                                                                                                                                                                                                                                                                                         | 100%       | DHC(E), FD, Nurse, AH     | Site visit & SOC Qn |
| Office Infrastructure |                                                                                                                                                                                                                                                                                                                                                                                                                                                            | Target Std | Service provider          | Source              |
| 9.                    | DHC/DHCE staff, scheme doctors, nurses and allied health professionals <b>must</b> have authorised access to the eHealth system.<br><i>("authorized access" means being able to use the system)</i>                                                                                                                                                                                                                                                        | 100%       | DHC(E), FD, Nurse, AH     | Site visit & SOC Qn |
| 10.                   | Scheme doctors, nurses and allied health professionals <b>must</b> have authorised access to the CDCC-IT system for participant data entry, review, sharing and retrieval.                                                                                                                                                                                                                                                                                 | 100%       | FD, Nurse, AH             | Site visit & SOC Qn |

|     |                                                                                                                                                                                                                                                                                   |      |                       |                     |
|-----|-----------------------------------------------------------------------------------------------------------------------------------------------------------------------------------------------------------------------------------------------------------------------------------|------|-----------------------|---------------------|
| 11. | The CDCC-IT system <b>must</b> be used for participant enrolment, and documentation of participant clinical data and management plan rendered under the CDCC-pilot scheme.                                                                                                        | 100% | DHC(E), FD, Nurse, AH | Site visit & SOC Qn |
| 12. | Scheme doctors <b>must</b> use the CDCC-IT system for making referral(s) and/or consultation(s) to specialists in the Hospital Authority and allied health professionals in the scheme.                                                                                           | 100% | FD                    | Site visit & SOC Qn |
| 13. | A booking system <b>must</b> be available for DHC/DHCE staff to arrange appointment(s) between participants and scheme doctors, nurses and allied health professionals.                                                                                                           | 100% | DHC(E), FD, Nurse, AH | Site visit          |
| 14. | A reminder system <b>must</b> be available for nurse(s) to remind participants for investigations and appointments with scheme doctor and allied health professionals.                                                                                                            | 100% | Nurse                 | Site visit          |
| 15. | There <b>must</b> be appropriate physical space provided for the Scheme.<br><i>("appropriate" means having dedicated space to allow for smooth operation of the Scheme; this could include space for participant registration, performing the HRFA and nurse clinic sessions)</i> | 100% | DHC(E), FD, Nurse, AH | Site visit          |
| 16. | Blood Pressure measurement device(s) <b>must</b> be available in DHC/DHCE and clinic(s) of the Scheme doctors.                                                                                                                                                                    | 100% | DHC(E), FD            | Site visit & SOC Qn |
| 17. | Instrument for testing sensation of the feet (e.g. tuning fork or monofilaments) <b>must</b> be available in the nurse clinic.<br><i>(note: having either the tuning fork or monofilament is considered adequate.)</i>                                                            | 100% | Nurse                 | SOC Qn              |
| 18. | Educational material(s), computer(s) and printer(s) <b>must</b> be available at all CDCC-pilot scheme service points.                                                                                                                                                             | 100% | DHC(E), FD, Nurse, AH | Site visit          |
| 19. | Fundi camera for retinal photo <b>must</b> be accessible to participants when indicated.                                                                                                                                                                                          | 100% | AH (optometrist)      | SOC Qn              |
| 20. | Scheme doctors <b>must</b> have access to designated laboratory services for the CDCC Pilot Scheme.<br><i>("have access to" means being able to order laboratory service)</i>                                                                                                     | 100% | FD                    | SOC Qn              |
| 21. | Laboratory test results <b>must</b> be available for viewing online by scheme doctors / nurses within 7 working days from date of testing.                                                                                                                                        | 100% | FD, Nurse             | Site visit & SOC Qn |
| 22. | A reminder system <b>must</b> be available to notify the scheme doctors after the laboratory test results have been uploaded online.                                                                                                                                              | 100% | FD                    | Site visit & SOC Qn |
| 23. | An emergency recall system <b>must</b> be available for laboratories to inform scheme doctors / nurses of critical results.                                                                                                                                                       | 100% | FD, Nurse             | Site visit & SOC Qn |
| 24. | Scheme doctors <b>must</b> have access to drugs on the list of specified drugs for the CDCC-Pilot Scheme.<br><i>("have access to" means being able to prescribe)</i>                                                                                                              | 100% | FD                    | Site visit & SOC Qn |

|                                                            |                                                                                                                                                                                                          |            |                           |                     |
|------------------------------------------------------------|----------------------------------------------------------------------------------------------------------------------------------------------------------------------------------------------------------|------------|---------------------------|---------------------|
| 25.                                                        | A scheme enquiry system must be available for scheme doctors, nurses and allied health professionals.                                                                                                    | 100%       | DHC(E), FD, Nurse, AH, ST | Site visit & SOC Qn |
| 26.                                                        | A scheme enquiry system must be available for scheme participants.                                                                                                                                       | 100%       | DHC(E)                    | Site visit & SOC Qn |
| <u>Programme Management &amp; Organizational Structure</u> |                                                                                                                                                                                                          | Target Std | Service provider          | Source              |
| 27.                                                        | Participant's enrolment and pairing record with the scheme doctor of choice <b><u>must</u></b> be properly documented and accessible in the eHealth/CDCC-IT system for authorised members of the scheme. | 100%       | DHC(E), FD, Nurse, AH     | SOC Qn              |
| 28.                                                        | Co-payment amount for each scheme doctor, allied health services and laboratory testing <b><u>must</u></b> be accessible to participants.<br>( <i>"accessible to" means being to</i> )                   | 100%       | DHC(E), FD, Nurse, AH     | SOC Qn              |
| 29.                                                        | There <b><u>must</u></b> be regular meetings among staff involved in the implementation of the scheme at each DHC/DHCE to monitor the performance of the programme.                                      | 100%       | DHC(E)                    | SOC Qn              |
| 30.                                                        | There <b><u>must</u></b> be regular meetings among CDCC operation teams in DHC/DHCE and PHO to monitor the performance of the programme.                                                                 | 100%       | DHC(E), PHO               | SOC Qn              |

### Process evaluation framework

| Patient and service provider eligibility |                                                                                                                                                                                                                                                 | Target Std | Source                           |
|------------------------------------------|-------------------------------------------------------------------------------------------------------------------------------------------------------------------------------------------------------------------------------------------------|------------|----------------------------------|
| 1.                                       | Participants enrolled into the CDCC-Pilot Scheme <b>must</b> be HK residents aged ≥45 years and without known diabetes mellitus (DM) or hypertension (HT).                                                                                      | 100%       | CDCC IT Module                   |
| 2.                                       | Participants <b>must</b> be a member of DHC/DHCE.                                                                                                                                                                                               | 100%       | CDCC IT Module                   |
| 3.                                       | Participants <b>must</b> agree to sharing their data in the electronic health record sharing system (eHealth).                                                                                                                                  | 100%       | CDCC IT Module                   |
| 4.                                       | Participants <b>must</b> have consented to CDCC-Pilot Scheme Terms & Conditions.                                                                                                                                                                | 100%       | SOC Qn<br>CDCC IT Module         |
| 5.                                       | Participants <b>must</b> be paired with a Family Doctor.                                                                                                                                                                                        | 100%       | CDCC IT Module                   |
| 6.                                       | Scheme doctors <b>must</b> be registered in the Primary Care Doctor (PCD) directory.                                                                                                                                                            | 100%       | Site visit &<br>SOC Qn           |
| 7.                                       | Scheme doctors <b>must</b> have consented to CDCC-Pilot Scheme Terms & Conditions.                                                                                                                                                              | 100%       | Site visit &<br>SOC Qn           |
| Service Delivery & Process of Care       |                                                                                                                                                                                                                                                 | Target Std | Source                           |
| 8.                                       | Participants <b>must</b> have at least one Blood Pressure (BP) measurement at the scheme doctor's office.                                                                                                                                       | 100%       | CDCC IT Module                   |
| 9.                                       | Participants <b>must</b> have at least one Haemoglobin-A1c (HbA1c) or fasting plasma glucose (FPG) measurement.                                                                                                                                 | 100%       | CDCC IT Module                   |
| 10.                                      | Participants <b>should</b> have at least one subsidised medical consultation within 12 months from the screening date.<br><i>("screening date": the date of 1<sup>st</sup> screening consultation)</i>                                          | 70%        | CDCC IT Module                   |
| 11.                                      | Participants who were started on medication treatment <b>should</b> have at least two subsidised medical consultation within 12 months from the screening date.<br><i>("screening date": the date of 1<sup>st</sup> screening consultation)</i> | 70%        | CDCC IT Module                   |
| 12.                                      | Participants <b>should</b> have one nurse clinic session within 3 months from the start of treatment phase.<br><i>("start of treatment phase": the date of 1<sup>st</sup> medical consultation)</i>                                             | 70%        | CDCC IT Module                   |
| 13.                                      | Participants <b>should</b> have at least one Health Risk Factor Assessment (HRFA) within 12 months the screening date.<br><i>("screening date": the date of 1<sup>st</sup> screening consultation)</i>                                          | 70%        | DHC IT Module,<br>CDCC IT Module |
| 14.                                      | Participants <b>should</b> have at least one repeat HbA1c or FPG measurement within 12 months from the screening date.<br><i>("screening date": the date of 1<sup>st</sup> screening consultation)</i>                                          | 70%        | CDCC IT Module                   |

|     |                                                                                                                                                                                                                                                |     |                                  |
|-----|------------------------------------------------------------------------------------------------------------------------------------------------------------------------------------------------------------------------------------------------|-----|----------------------------------|
| 15. | Participants <b>should</b> have at least one repeat full lipid profile measurement 12 months from the screening date.<br><i>("screening date": the date of 1<sup>st</sup> screening consultation)</i>                                          | 70% | CDCC IT Module                   |
| 16. | Participants <b>could</b> have one Intensive Diabetes Prevention Programme (IDPP) session within 6 months from the start of treatment phase.<br><i>("start of treatment phase": the date of 1<sup>st</sup> medical consultation)</i>           | 50% | CDCC IT Module                   |
| 17. | Participants <b>should</b> have at least one full lipid profile measurement within 3 months from the screening date.<br><i>("screening date": the date of 1<sup>st</sup> screening consultation)</i>                                           | 90% | CDCC IT Module                   |
| 18. | Participants <b>should</b> have at least one renal function test (RFT) with glomerular filtration rate (eGFR) results within 3 months from the screening date.<br><i>("screening date": the date of 1<sup>st</sup> screening consultation)</i> | 90% | CDCC IT Module                   |
| 19. | Participants with HT <b>should</b> have at least one urine analysis measurement within 3 months from the screening date.<br><i>("screening date": the date of 1<sup>st</sup> screening consultation)</i>                                       | 90% | CDCC IT Module                   |
| 20. | Participants with DM <b>should</b> have at least one urine albumin-creatinine ratio (ACR) measurement within 3 months from the screening date.<br><i>("screening date": the date of 1<sup>st</sup> screening consultation)</i>                 | 90% | CDCC IT Module                   |
| 21. | Participants <b>should</b> have at least one foot assessment within 3 months from the start of treatment phase.<br><i>("start of treatment phase": the date of 1<sup>st</sup> medical consultation)</i>                                        | 90% | CDCC IT Module                   |
| 22. | Participants <b>should</b> have at least one optometry assessment within 3 months from the start of treatment phase.<br><i>("start of treatment phase": the date of 1<sup>st</sup> medical consultation)</i>                                   | 90% | CDCC IT Module                   |
| 23. | Participants <b>should</b> have at least two subsidised medical consultations within 12 months from the screening date.<br><i>("screening date": the date of 1<sup>st</sup> screening consultation)</i>                                        | 90% | CDCC IT Module                   |
| 24. | Participants started on medication treatment <b>must</b> have at least four subsidised medical consultations within 12 months from the screening date.<br><i>("screening date": the date of 1<sup>st</sup> screening consultation)</i>         | 90% | CDCC IT Module                   |
| 25. | Participants <b>should</b> have at least one nurse clinic session within 3 months from the start of treatment phase.<br><i>("start of treatment phase": the date of 1<sup>st</sup> medical consultation)</i>                                   | 70% | CDCC IT Module                   |
| 26. | Participants <b>should</b> have at least one HRFA within 12 months from the screening date.<br><i>("screening date": the date of 1<sup>st</sup> screening consultation)</i>                                                                    | 70% | DHC IT Module,<br>CDCC IT Module |

|                                                       |                                                                                                                                                                                                                              |            |                |
|-------------------------------------------------------|------------------------------------------------------------------------------------------------------------------------------------------------------------------------------------------------------------------------------|------------|----------------|
| 27.                                                   | Participants with HT <b>should</b> have at least one repeat HbA1c or FPG measurement within 12 months from the screening date.<br>(“screening date”: the date of 1 <sup>st</sup> screening consultation)                     | 70%        | CDCC IT Module |
| 28.                                                   | Participants with DM <b>should</b> have at least one repeat HbA1c measurement within 12 months from screening date.<br>(“screening date”: the date of 1 <sup>st</sup> screening consultation)                                | 70%        | CDCC IT Module |
| 29.                                                   | Participants <b>should</b> have at least one repeat full lipid profile measurement within 12 months from screening date.<br>(“screening date”: the date of 1 <sup>st</sup> screening consultation)                           | 70%        | CDCC IT Module |
| 30.                                                   | Participants <b>should</b> have at least one repeat RFT with eGFR result within 12 months from the screening date.<br>(“screening date”: the date of 1 <sup>st</sup> screening consultation)                                 | 70%        | CDCC IT Module |
| 31.                                                   | Participants with HT <b>should</b> have at least one repeat urine analysis within 12 months from the screening date.<br>(“screening date”: the date of 1 <sup>st</sup> screening consultation)                               | 70%        | CDCC IT Module |
| 32.                                                   | Participants with DM <b>should</b> have at least one repeat urine ACR measurement within 12 months from the screening date.<br>(“screening date”: the date of 1 <sup>st</sup> screening consultation)                        | 70%        | CDCC IT Module |
| 33.                                                   | Participants <b>should</b> have at least one repeat foot assessment within 12 months from the screening date.<br>(“screening date”: the date of 1 <sup>st</sup> screening consultation)                                      | 70%        | CDCC IT Module |
| 34.                                                   | Participants with DM <b>should</b> have at least one repeat optometry assessment within 12 months from the screening date.<br>(“screening date”: the date of 1 <sup>st</sup> screening consultation)                         | 70%        | CDCC IT Module |
| 35.                                                   | Participants <b>could</b> have at least one Patient Empowerment Programme (PEP) session within 6 months from the start of treatment phase.<br>(“start of treatment phase”: the date of 1 <sup>st</sup> medical consultation) | 50%        | CDCC IT Module |
| <u>Service Delivery &amp; Process of Care</u>         |                                                                                                                                                                                                                              | Target Std | Source         |
| <b>Life course preventive care (All participants)</b> |                                                                                                                                                                                                                              |            |                |
| (i) Vaccination                                       |                                                                                                                                                                                                                              |            |                |
| 1.                                                    | Participants <b>could</b> be given advice on seasonal influenza vaccine                                                                                                                                                      | 50%        | CDCC IT Module |
| 2.                                                    | Participants aged 65 years and above <b>could</b> be given advice on pneumococcal vaccine.                                                                                                                                   | 50%        | CDCC IT Module |
| (ii) Cancer Screening                                 |                                                                                                                                                                                                                              |            |                |
| 3.                                                    | Participants aged 50 to 75 <b>could</b> be given advice on colorectal cancer screening.                                                                                                                                      | 50%        | CDCC IT Module |

|                                         |                                                                                                                                              |     |                               |
|-----------------------------------------|----------------------------------------------------------------------------------------------------------------------------------------------|-----|-------------------------------|
| 4.                                      | Female participants aged 45 and above <b><u>could</u></b> be given advice on cervical cancer screening.                                      | 50% | CDCC IT Module                |
| 5.                                      | Female participants aged 45 to 69 <b><u>could</u></b> be given advice on Breast cancer screening.                                            | 50% | CDCC IT Module                |
| (iii) Lifestyle modification activities |                                                                                                                                              |     |                               |
| 6.                                      | Current smokers <b><u>could</u></b> receive at least one intervention under the topic “Smoking Cessation”.                                   | 30% | CDCC IT Module, DHC IT Module |
| 7.                                      | Drinkers <b><u>could</u></b> receive at least one intervention under the topic “Alcohol Abstinence”.                                         | 30% | CDCC IT Module, DHC IT Module |
| 8.                                      | Participants with BMI $\geq 25$ kg/m <sup>2</sup> <b><u>could</u></b> receive at least one intervention under the topic “Weight Management”. | 30% | CDCC IT Module, DHC IT Module |

### Outcome evaluation framework

| <u>Clinical Outcomes</u> |                                                                                                                                                                                                                            | Target Std | Source         |
|--------------------------|----------------------------------------------------------------------------------------------------------------------------------------------------------------------------------------------------------------------------|------------|----------------|
| 1.                       | Participants with DM <b><u>should</u></b> have HbA1c < 7% one year after joining the scheme.<br>(Incentive Payment to Dr (1): ≥ 70% Scheme Participants achieved the HbA1c < 7%)                                           | 70%        | CDCC IT Module |
| 2.                       | Participants with DM <b><u>should</u></b> have improvement in HbA1c 12 months after joining the scheme.                                                                                                                    | 70%        | CDCC IT Module |
| 3.                       | Participants with DM <b><u>should</u></b> have BP < 130/80 mmHg 12 months after joining the scheme.<br>(Incentive Payment to Dr (2) : ≥ 70% Scheme Participants with DM achieved the BP < 130/80 mmHg)                     | 70%        | CDCC IT Module |
| 4.                       | Participants with HT without DM <b><u>should</u></b> have BP < 140/90 mmHg 12 months after joining the scheme.<br>(Incentive Payment to Dr (3) ≥ 70% Scheme Participants with HT without DM achieved the BP < 140/90 mmHg) | 70%        | CDCC IT Module |
| 5.                       | Participants with HT <b><u>should</u></b> have improvement in BP 12 months after joining the scheme.                                                                                                                       | 70%        | CDCC IT Module |
| 6.                       | Participants with DM <b><u>should</u></b> have Low Density Lipoprotein-Cholesterol (LDC-C) <2.6 mmol/L 12 months after joining the scheme.                                                                                 | 70%        | CDCC IT Module |
| 7.                       | Participants with DM <b><u>could</u></b> have improvement in LDC-C 12 months after joining the scheme.                                                                                                                     | 50%        | CDCC IT Module |
| 8.                       | Participants with Body Mass Index (BMI) ≥ 25 kg/m <sup>2</sup> <b><u>could</u></b> have improvement in BMI 12 months after joining the scheme.                                                                             | 50%        | CDCC IT Module |
| 9.                       | Number of smokers <b><u>could</u></b> decrease 12 months after the scheme                                                                                                                                                  | Decrease   | CDCC IT Module |
| 10.                      | Number of alcohol drinkers <b><u>could</u></b> decrease 12 months after the scheme.                                                                                                                                        | Decrease   | CDCC IT Module |
| 11.                      | Number of participants with BMI ≥ 25 kg/m <sup>2</sup> <b><u>could</u></b> decrease 12 months after the scheme.                                                                                                            | Decrease   | CDCC IT Module |



| Patient-reported outcomes |                                                                                                        |     | Source |
|---------------------------|--------------------------------------------------------------------------------------------------------|-----|--------|
| 12.                       | Patients <b><u>should</u></b> be more enabled after joining the scheme.                                | 70% | PRO Qn |
| 13.                       | Patients <b><u>could</u></b> have home BP monitoring and report in eHealth App at least once per month | 50% | eHRSS  |
